# Supplementary material for: Mexican BRCA1 founder mutation: Shortening the gap in genetic assessment for hereditary breast and ovarian cancer patients
Source: PLOS journal article supplement (doi:10.1371/journal.pone.0222709), 2019-09-23
Supplement: S2 (10.1371/journal.pone.0222709.s002) [file journal.pone.0222709.s002]

**S1 TABLE. Familial features of relatives tested for pre-symptomatic diagnosis of 9-12 del *BRCA1***

| FAMILY ID | NUMBER OF FAMILY MEMBERS TESTED FOR DEL 9-12 <i>BRCA1</i> | GENDER OF FAMILY MEMBERS TESTED FOR DEL 9-12 <i>BRCA1</i> | TYPE OF TUMORS IN THE FAMILY                                      | NUMBER OF FAMILY MEMBERS AFFECTED BY CANCER | DEGREE OF KINSHIP (RELATIVES WITH CANCER) |
|-----------|-----------------------------------------------------------|-----------------------------------------------------------|-------------------------------------------------------------------|---------------------------------------------|-------------------------------------------|
| F1        | 5                                                         | 5 females                                                 | Information not available                                         | 1                                           | 2°                                        |
| F2        | 3                                                         | 3 females                                                 | Breast; cervical; bronchogenic.                                   | 3                                           | 1st                                       |
| F3        | 4                                                         | 4 females                                                 | Breast; prostate; cervical; colorectal cancer                     | 4                                           | 1st and 2°                                |
| F4        | 2                                                         | 2 females                                                 | Breast cancer                                                     | 2                                           | 1st                                       |
| F5        | 8                                                         | 4 females; 4 males                                        | Breast; ovarian; prostate; esophageal; hepatic; renal; testicular | 13                                          | 1st, 2°, 3°                               |
| F6        | 1                                                         | 1 female                                                  | Information not available                                         | -----                                       | -----                                     |
| F7        | 8                                                         | 6 females; 2 male                                         | Breast                                                            | 3                                           | 1st                                       |
| F8        | 2                                                         | 2 females                                                 | Breast; endometrium                                               | 8                                           | 1st, 2°                                   |
| F9        | 17                                                        | 13 females; 4 males                                       | Cervical; stomach; renal                                          | 3                                           | 1st; 2°                                   |
| F10       | 1                                                         | 1 female                                                  | Breast; cervical; duodenum                                        | 5                                           | 1st; 2°; 3°                               |
| F11       | 2                                                         | 2 females                                                 | Breast; leukemia                                                  | 3                                           | 1st; 2°; 3°                               |
| F12       | 7                                                         | 4 females; 3 males                                        | Melanoma; Cancer type not specified                               | 2                                           | 1st; 2°                                   |
| F13       | 7                                                         | 5 females; 2 males                                        | Breast                                                            | 1                                           | 1st                                       |
| F14       | 4                                                         | 1 female; 3 males                                         | Breast; lung; stomach                                             | 3                                           | 1st; 2°                                   |
| F15       | 8                                                         | 7 females; 1 male                                         | Breast                                                            | 2                                           | 1st                                       |
| F16       | 2                                                         | 2 males                                                   | Breast; Hodgkin's lymphoma                                        | 2                                           | 3°; 4°                                    |
| F17       | 5                                                         | 2 females; 3 males                                        | Breast; stomach                                                   | 2                                           | 2°                                        |
| F18       | 3                                                         | 2 females; 1 male                                         | Ovarian                                                           | 1                                           | 1st                                       |

|     |    |                    |                                           |       |              |
|-----|----|--------------------|-------------------------------------------|-------|--------------|
| F19 | 6  | 4 females; 2 males | Non family history                        | ----- | -----        |
| F20 | 4  | 2 females; 2 males | Non family history                        | ----- | -----        |
| F21 | 1  | 1 female           | Non family history                        | ----- | -----        |
| F22 | 5  | 2 female; 3 males  | Hepatic; cervical                         | 2     | 2°           |
| F23 | 11 | 6 females; 5 males | Ovarian; breast                           | 2     | 1st; 2°      |
| F24 | 2  | 1 female; 1 male   | Breast; endometrium; bile ducts; prostate | 5     | 1st; 2°      |
| F25 | 3  | 2 females; 1 male  | Renal; stomach                            | 2     | 1st; 2°      |
| F26 | 2  | 2 females          | Breast; ovarian; stomach; lung            | 7     | 1st; 2°; 3°  |
| F27 | 1  | 1 female           | Breast                                    | 4     | 4°; 5°       |
| F28 | 1  | 1 female           | Breast                                    | 3     | 1st; 2°      |
| F29 | 1  | 1 female           | Colorectal                                | 1     | 2°           |
| F30 | 1  | 1 female           | Breast; ovarian; stomach                  | 5     | 1st; 2° ; 3° |
